# Supplementary material
Source: MDPI journal article supplement (https://www.mdpi.com/1424-8247/15/1/26)
Supplement: s1 [file s1]

## Supporting Information

### **Discovery of cofactor competitive inhibitors against the human methyltransferase fibrillarin**

Yun Shi, Ibrahim M. El-Deeb, Veronika Masic, Lauren Hartley-Tassell, Andrea Maggioni, Mark von Itzstein\* and Thomas Ve\*

Institute for Glycomics, Griffith University, Southport, QLD 4222, Australia.

|                          |         |
|--------------------------|---------|
| Supplementary Figures    | Page 2  |
| Supplementary Tables     | Page 12 |
| Supplementary References | Page 16 |

## Supplementary Figures

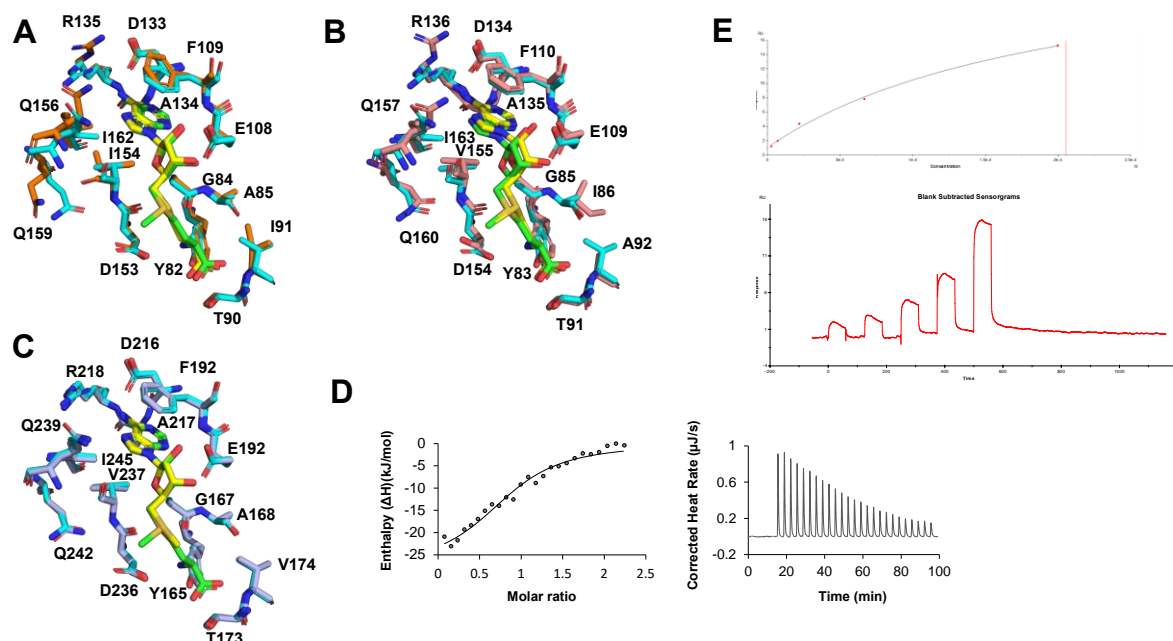

**Figure S1.** The hFBL cofactor binding site display high structural similarity to previously reported FBL structures. (A-C) Superimposition (stick representation) of hFBL<sup>SAM</sup> (residues in cyan; SAM in green) with (A) *Saccharolobus solfataricus* FBL (residues in orange, SAM in yellow), (B) *Aeropyrum pernix* FBL<sup>SAH</sup> (residues in wheat, SAH in yellow) and (C) hFBL<sup>MTA</sup> (residues in light blue, MTA in yellow). The *Saccharolobus solfataricus*, *Aeropyrum pernix* and human FBL binding site residues are labelled in (A), (B) and (C), respectively. Oxygen, nitrogen, and sulfur atoms are colored in red, blue, and light orange, respectively. (D) Integrated (left) and raw (right) ITC data for the titration of 0.5 mM SAM with 100  $\mu$ M hFBL. (E) SPR sensorgram (bottom) and data fitting (top) for SAM binding affinity with hFBL via SPR.

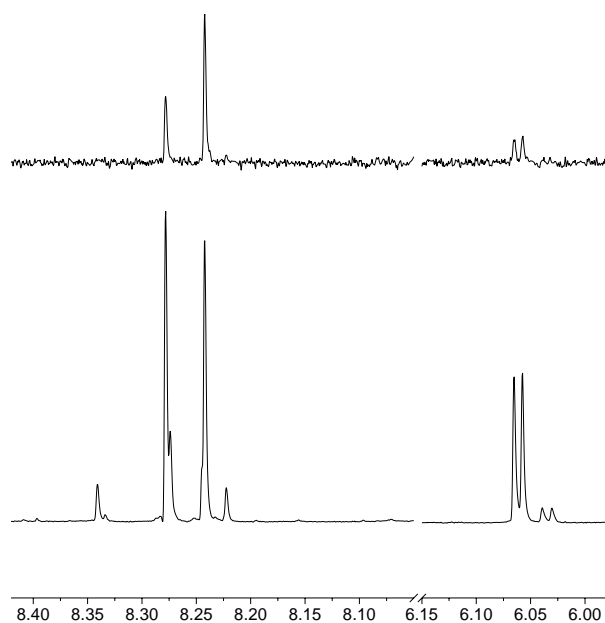

**Figure S2.** Expansions of reference (bottom) and difference (top, scaled 8X) STD NMR spectra showing binding of 0.5 mM SAM to 20  $\mu$ M hFBL.

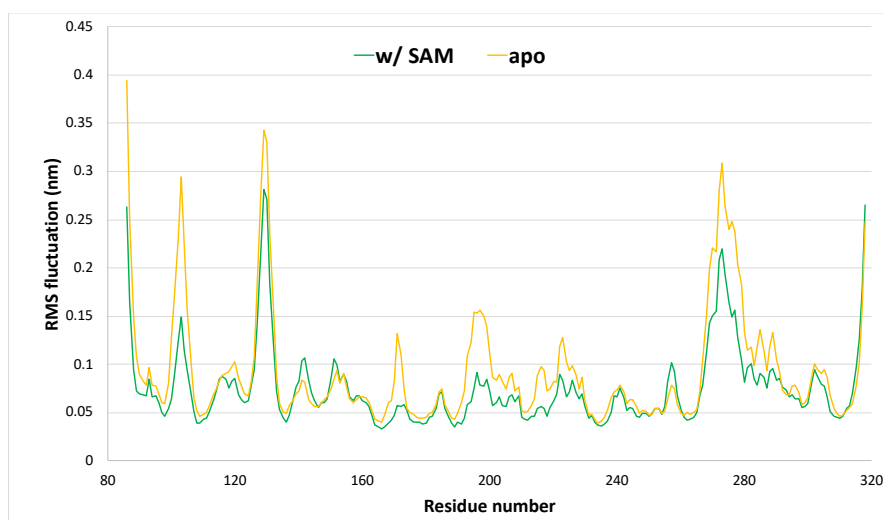

**Figure S3.** Root mean square fluctuations (RMSF) of hFBL residues during MD simulations. The RMSF values correspond to averages of triplicate MD runs.

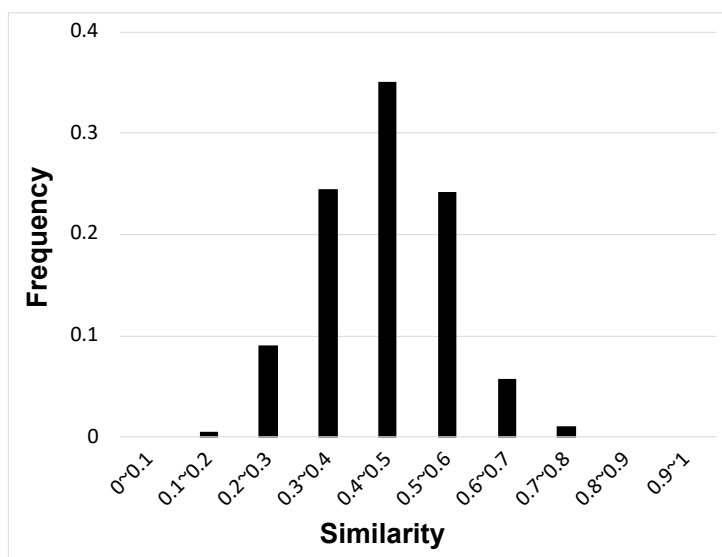

**Figure S4.** Distribution of similarity scores between each fragment and its closest neighbour.

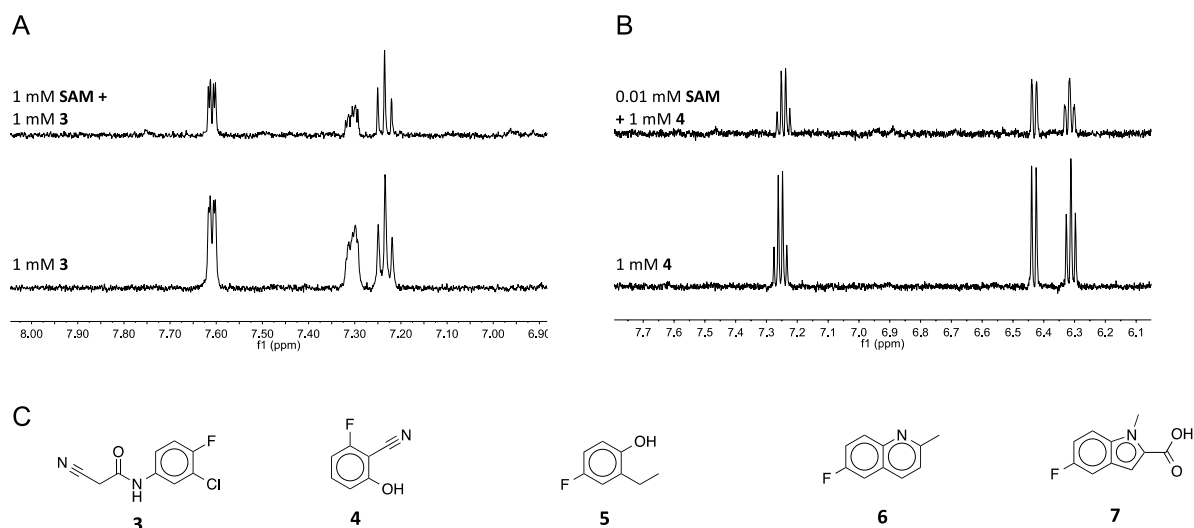

**Figure S5.** STD NMR analysis of selected fragment hits from  $^{19}\text{F}$  NMR detected screening with hFBL. A) Expansions of STD NMR spectra showing the binding of 1 mM **3** to 40  $\mu\text{M}$  hFBL in the absence (bottom expansion) and presence (top expansion) of 1 mM SAM, with 800 scans and 2 sec saturation time. B) Expansions of STD NMR spectra showing the binding of 1 mM **4** to 30  $\mu\text{M}$  hFBL in absence (bottom expansion) and presence (top expansion) of 0.01 mM SAM (bottom expansion), with 1600 scans and 2 sec saturation time. C) Chemical structures of fragment hits identified by  $^{19}\text{F}$  NMR detected screening.

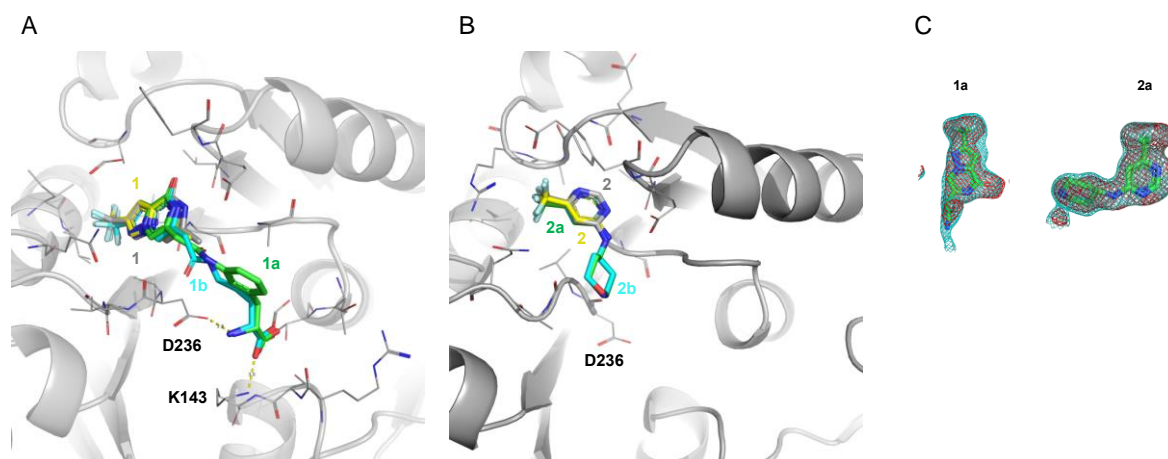

**Figure S6.** Docked poses of top-ranking compounds designed to bind at the cofactor binding site of hFBL. A) Overlay of docked poses of **1** (yellow), **1a** (green), and **1b** (cyan) with the crystal structure of hFBL in complex with **1** (grey). B) Overlay of docked poses of **2** (yellow), **2a** (green), and **2b** (cyan) with the crystal structure of hFBL in complex with **2** (grey). The protein backbone is displayed in cartoon representation. Ligands and residues are displayed in thick and thin stick representations, respectively. Oxygen, nitrogen and fluorine atoms are coloured in red, blue and pale cyan, respectively. C) Standard omit mFo-DFc (red mesh, contoured at 3.0  $\sigma$ ) and polder (cyan mesh, contoured at 4.0  $\sigma$ ) maps of **1a** and **2a**.

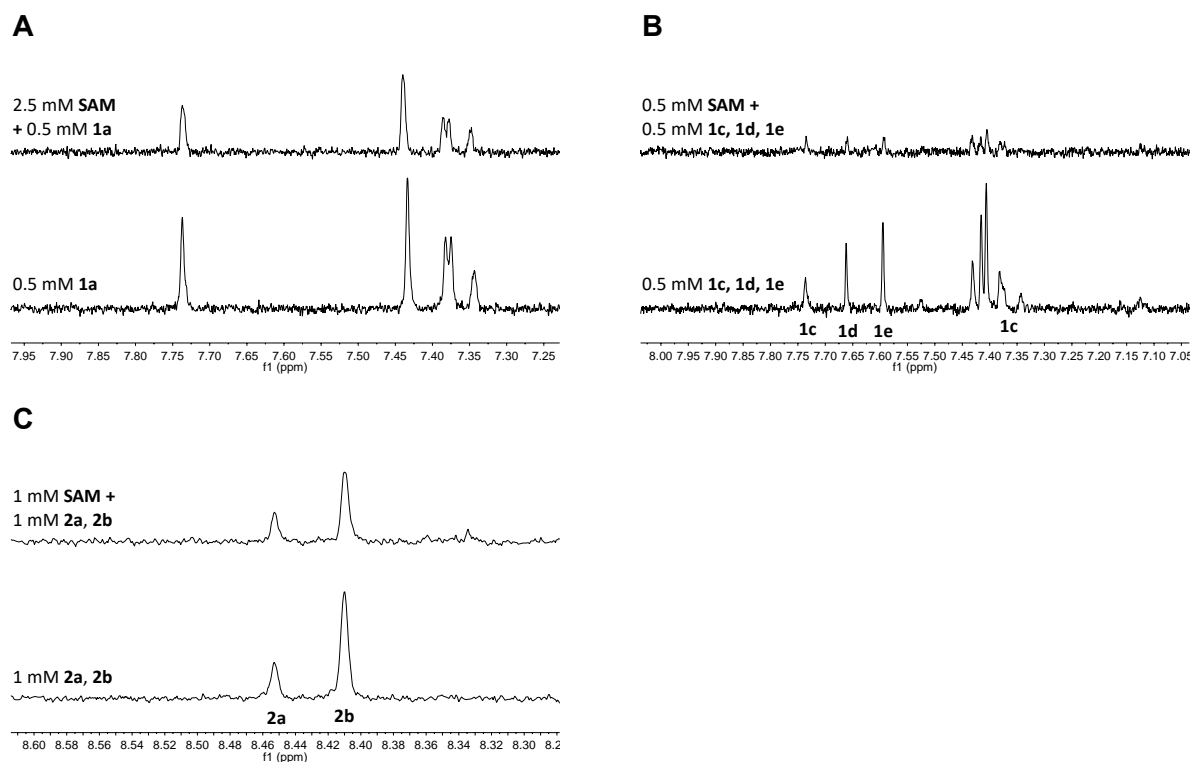

**Figure S7.** STD NMR analysis of selected fragment derivatives with hFBL in the presence and absence of SAM, respectively. A) STD NMR spectra showing the binding of 0.5 mM **1a** to 20  $\mu$ M hFBL in the absence (bottom expansion) and presence (top expansion) of 2.5 mM SAM, with 1024 scans and 3 sec saturation time. B) STD NMR spectra showing the binding of 0.5 mM **1c**, **1d**, and **1e** to 20  $\mu$ M hFBL in the absence (bottom expansion) and presence (top expansion) of 0.5 mM SAM, with 1024 scans and 2 sec saturation time. C) STD NMR spectra showing the binding of 1 mM **2a** and **2b** to 40  $\mu$ M hFBL in the absence (bottom expansion) and presence (top expansion) of 1 mM SAM, with 512 scans and 3 sec saturation time.

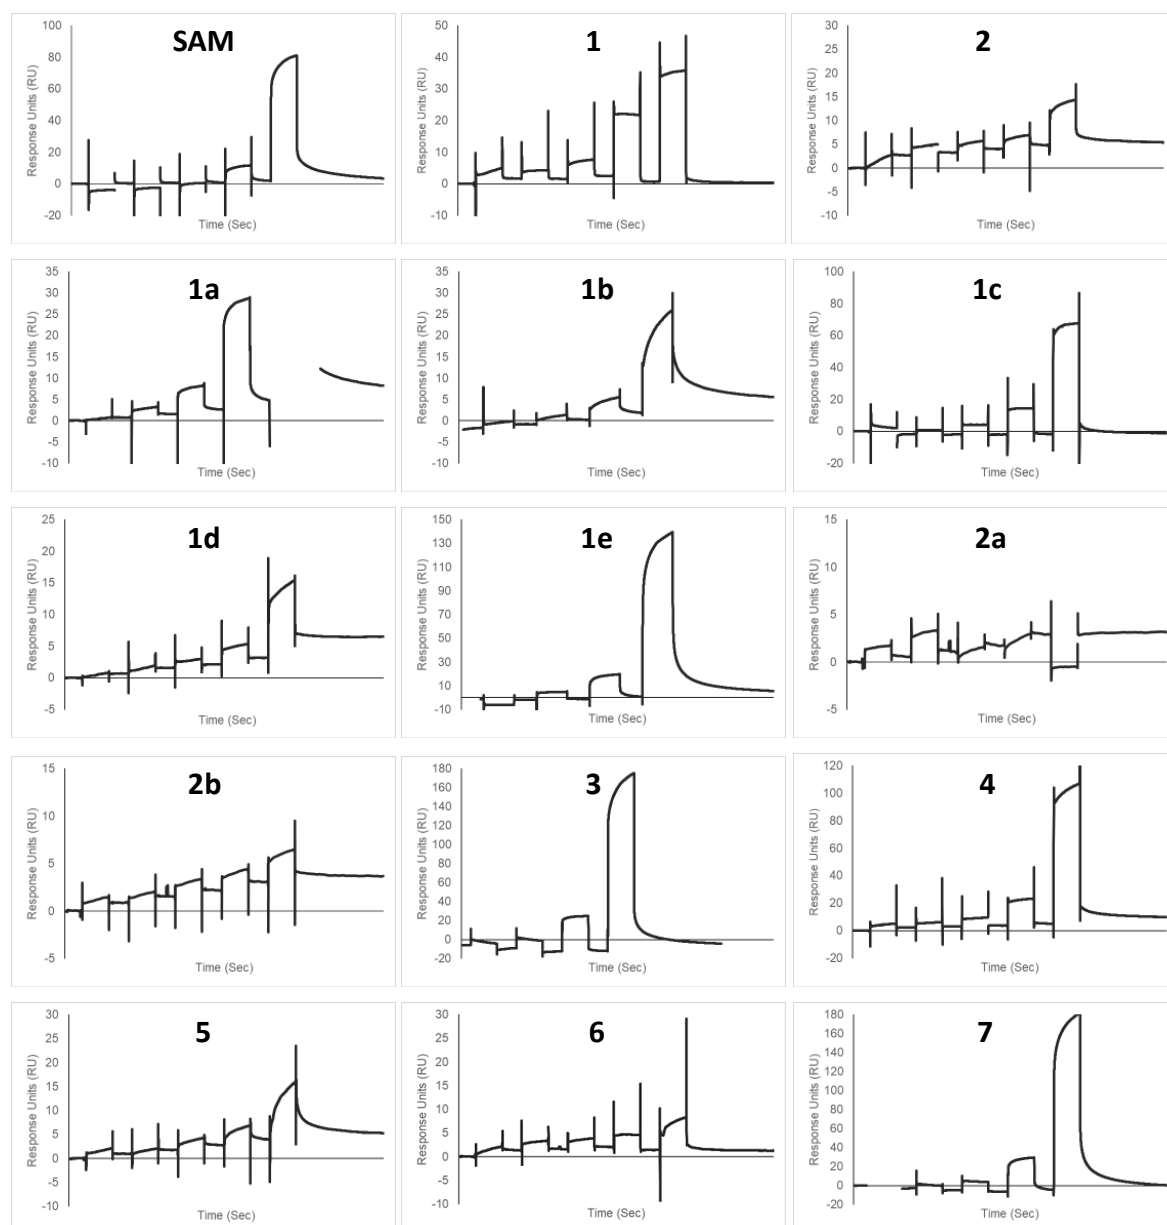

**Figure S8.** Representative sensorgrams from SPR analysis of the interaction between hFBL and various ligands.

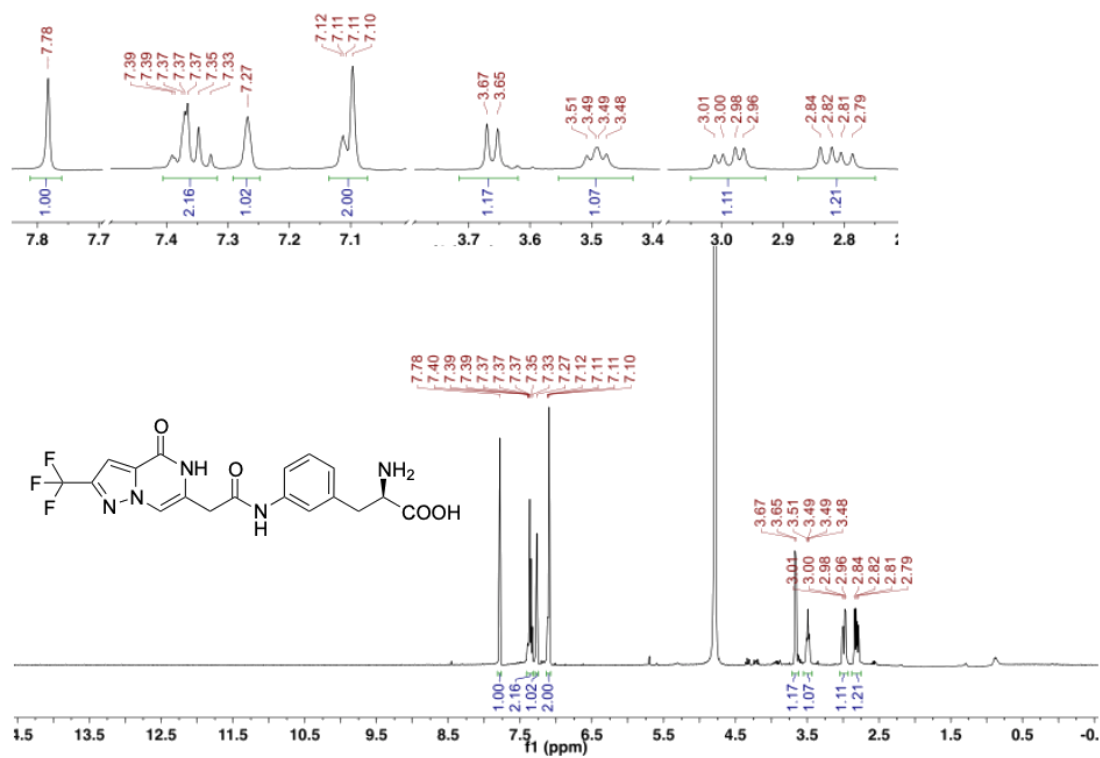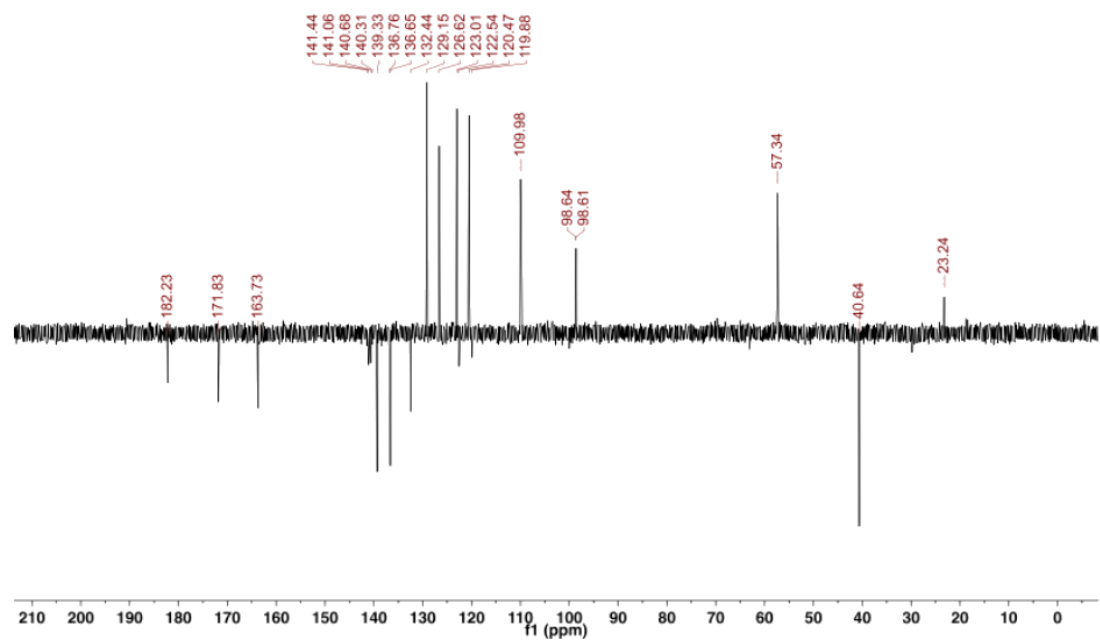

**Figure S9.** NMR spectra of **1a**.



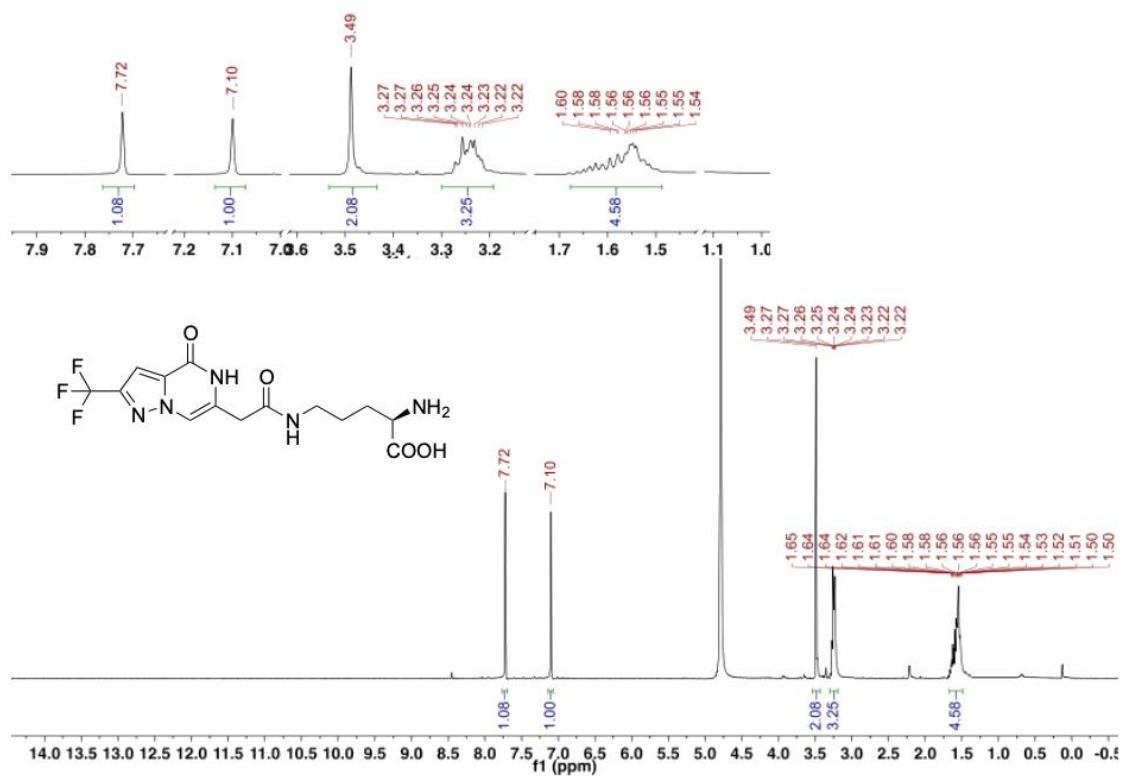

<sup>1</sup>H NMR Spectrum

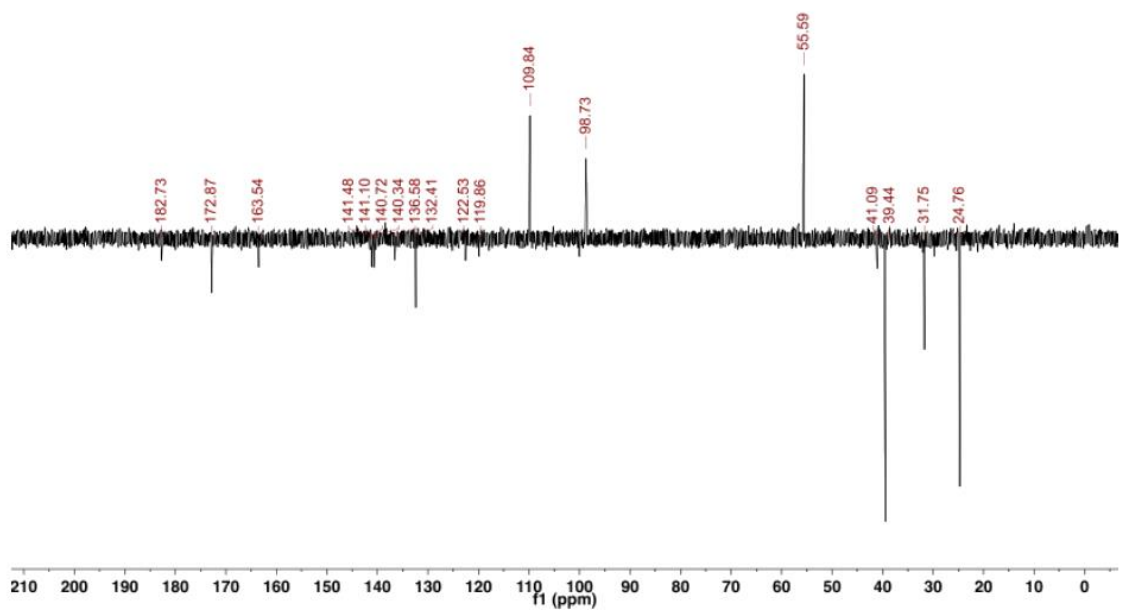

<sup>13</sup>C NMR Spectrum

**Figure S10.** NMR spectra of **1b**.

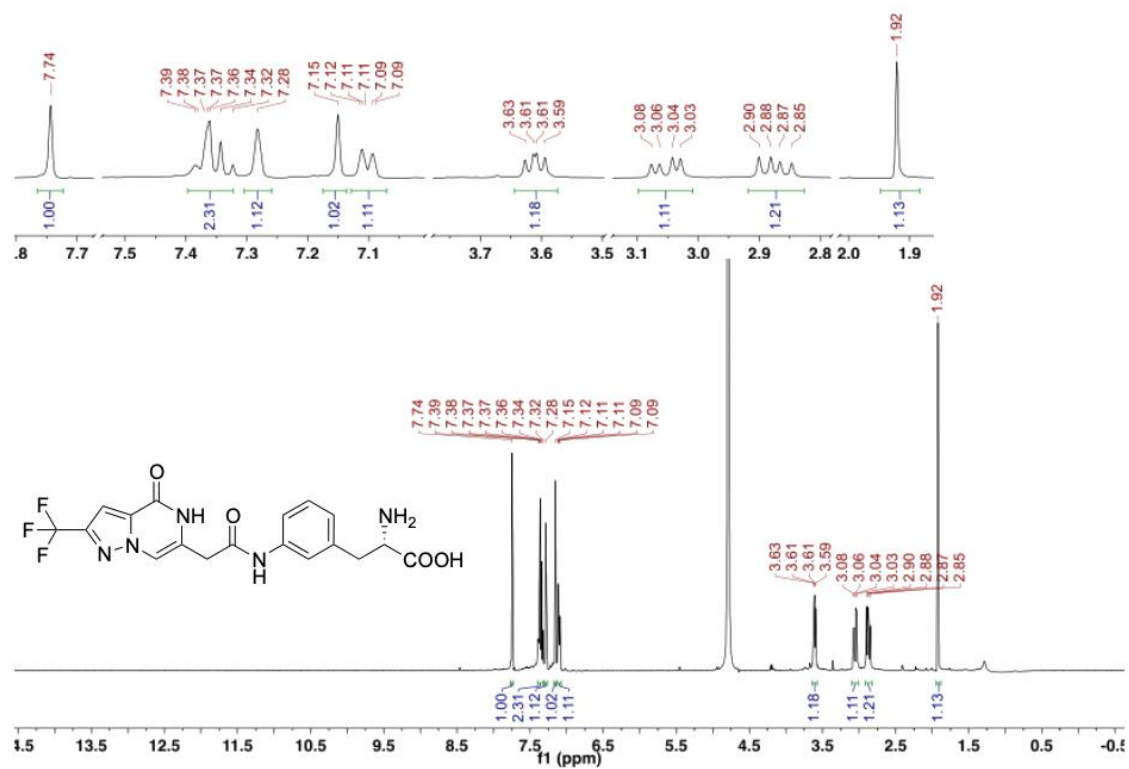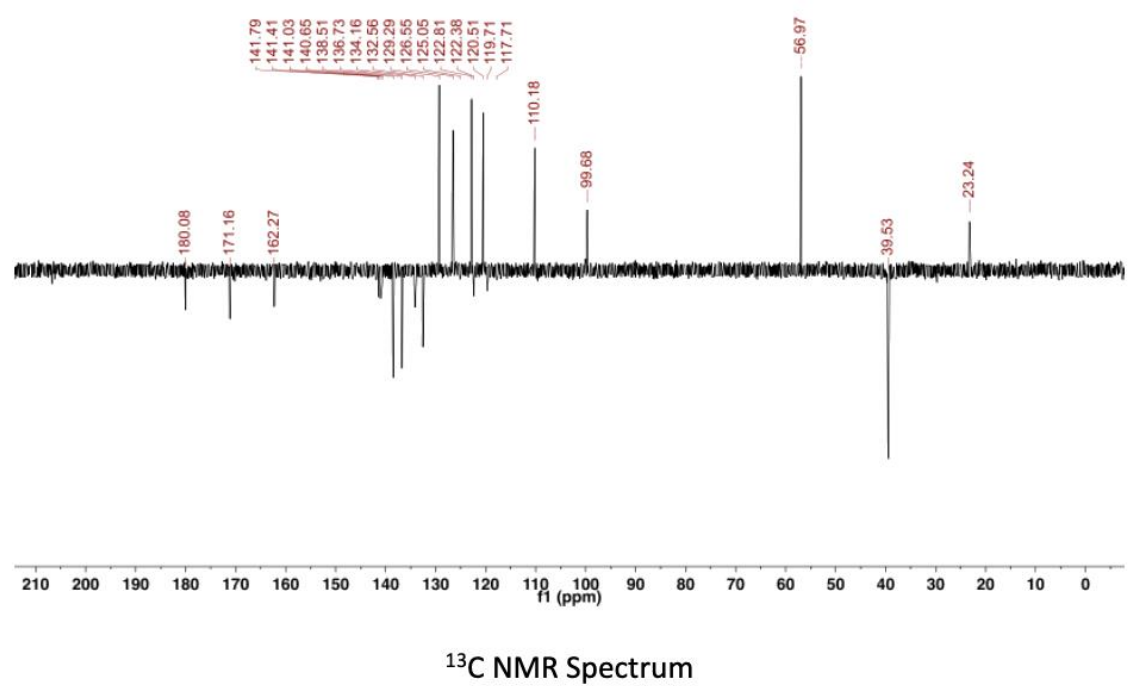

**Figure S11.** NMR spectra of **1c**.

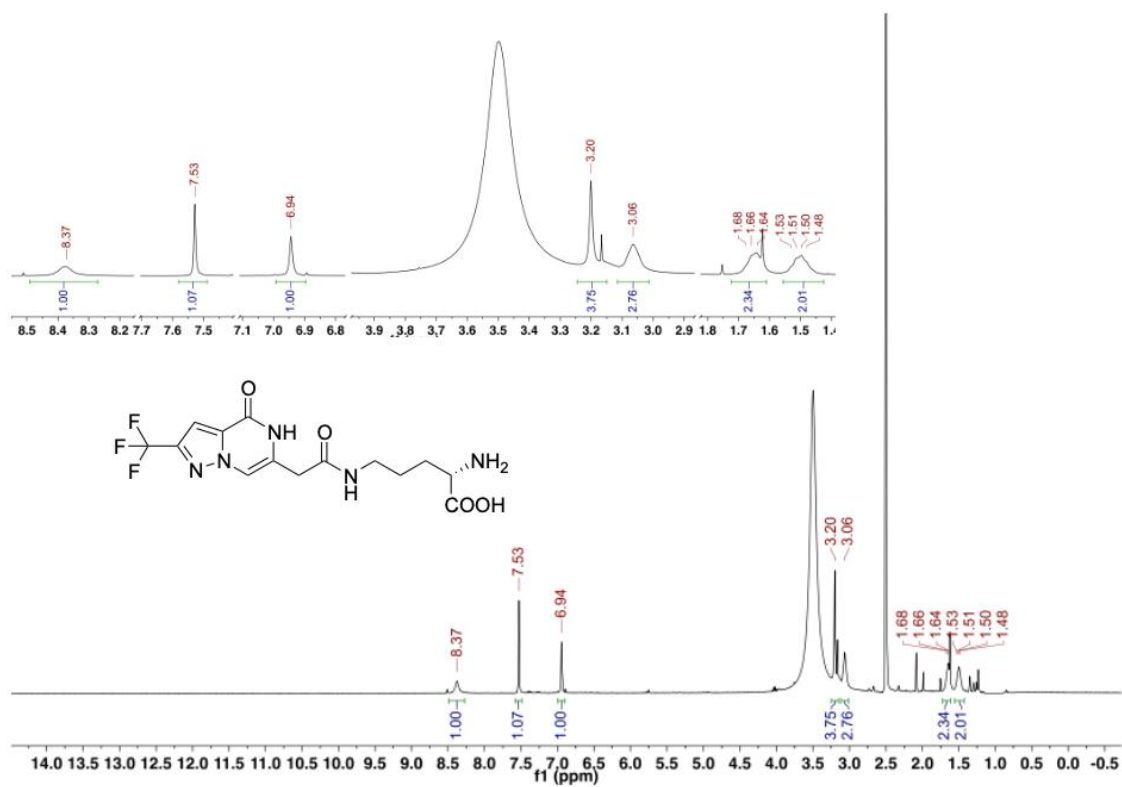

<sup>1</sup>H NMR Spectrum

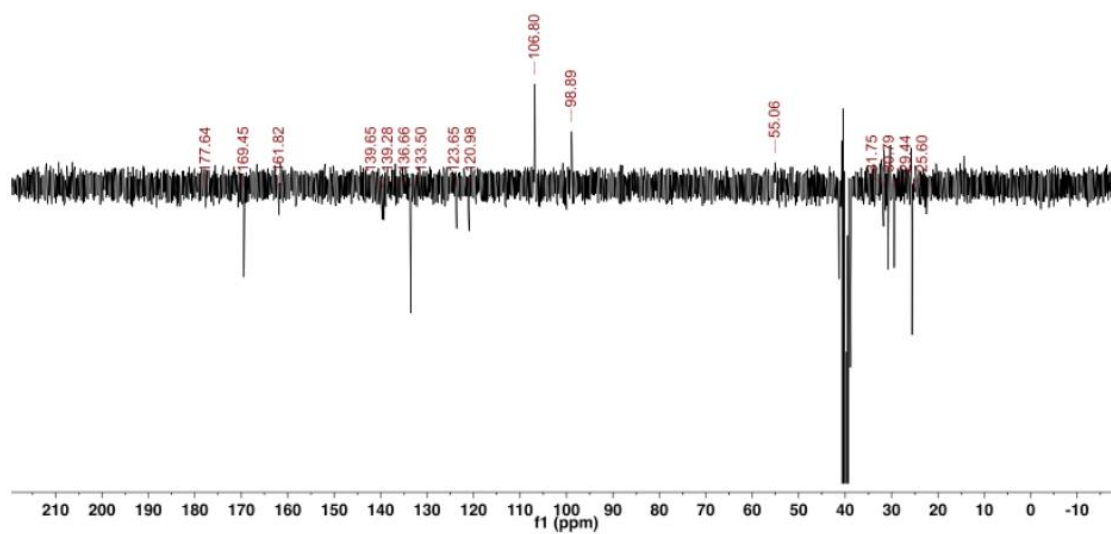

<sup>13</sup>C NMR Spectrum

**Figure S12.** NMR spectra of **1d**.

## Supplementary Tables

**Table S1.** Crystallographic data.

|                                    | hFBL:Apo                      | hFBL:SAM                      | hFBL:1 (cocktail<br>soak)             | hFBL:1 (single<br>soak)              | hFBL:1a                               | hFBL:2 (cocktail<br>soak)             | hFBL:2 (single<br>soak)       | hFBL:2a                       |
|------------------------------------|-------------------------------|-------------------------------|---------------------------------------|--------------------------------------|---------------------------------------|---------------------------------------|-------------------------------|-------------------------------|
| <b>Data collection</b>             |                               |                               |                                       |                                      |                                       |                                       |                               |                               |
| Space group                        | C 2 2 21                      | C 2 2 21                      | P 21 2 21                             | P 21 21 2                            | P 21 2 21                             | C 2 2 21                              | C 2 2 21                      | C 2 2 21                      |
| Cell dimensions                    |                               |                               |                                       |                                      |                                       |                                       |                               |                               |
| a, b, c (Å)                        | 69.14, 138.19,<br>66.55       | 69.28, 138.92,<br>65.67       | 68.04, 68.87,<br>138.65               | 67.61, 68.97,<br>138.55              | 68.38, 68.87,<br>136.44               | 69.13, 138.65,<br>66.43               | 69.21, 138.90,<br>66.48       | 69.29, 139.58,<br>66.25       |
| $\alpha, \beta, \gamma$ (°)        | 90, 90, 90                    | 90, 90, 90                    | 90, 90, 90                            | 90, 90, 90                           | 90, 90, 90                            | 90, 90, 90                            | 90, 90, 90                    | 90, 90, 90                    |
| Resolution (Å)                     | 47.93 - 1.99<br>(2.04 - 1.99) | 47.72 - 1.75 (1.78<br>- 1.75) | 48.40 - 1.75 (1.78 -<br>1.75)         | 48.88 - 1.75 (1.78 -<br>1.75)        | 48.53 - 1.90 (1.94 -<br>1.90)         | 47.96 - 1.91 (1.95<br>- 1.91)         | 48.03 - 1.81 (1.84<br>- 1.81) | 48.05 - 1.90 (1.94 -<br>1.90) |
| Total reflections                  | 162,232 (11,659)              | 236,103 (12,290)              | 486,995 (26,465)                      | 479,341 (24,211)                     | 234,657 (15,320)                      | 182,482 (11,449)                      | 384,489 (16,162)              | 329,093 (18,603)              |
| Unique reflections                 | 22,206 (1623)                 | 32,353 (1745)                 | 65,541 (3509)                         | 66,058 (3,465)                       | 51,310 (3,233)                        | 25,161 (1639)                         | 29,246 (1,359)                | 25,684 (1,570)                |
| Completeness (%)                   | 99.9 (99.4)                   | 99.9 (97.9)                   | 98.7 (97.5)                           | 99.7 (96.1)                          | 99.5 (99.3)                           | 99.8 (97.3)                           | 97.5 (77.6)                   | 99.5 (95.9)                   |
| Multiplicity                       | 7.3 (7.2)                     | 7.3 (7.0)                     | 7.4 (7.5)                             | 7.3 (7.0)                            | 4.6 (4.7)                             | 7.3 (7.0)                             | 13.1 (11.9)                   | 12.8 (11.8)                   |
| Wilson plot B (Å <sup>2</sup> )    | 37.0                          | 36.8                          | 18.5                                  | 19.0                                 | 33.4                                  | 24.2                                  | 28.4                          | 29.0                          |
| R <sub>meas</sub> (%)              | 5.7 (117.5)                   | 7.8 (77.6)                    | 7.0 (82.2)                            | 5.9 (69.8)                           | 9.0 (127.2)                           | 6.3 (89.9)                            | 8.1 (174.1)                   | 5.0 (47.5)                    |
| R <sub>merge</sub> (%)             | 4.9 (100.7)                   | 6.7 (66.3)                    | 6.0 (71.0)                            | 5.1 (59.8)                           | 7.0(101.1)                            | 5.9 (83.3)                            | 7.5 (159.4)                   | 4.6 (43.5)                    |
| R <sub>pim</sub> (%)               | 2.9 (60.2)                    | 4.0- (39.9)                   | 3.5 (41.3)                            | 3.0 (35.7)                           | 5.5 (76.2)                            | 2.3 (33.4)                            | 3.1 (69.0)                    | 1.9 (18.9)                    |
| $\langle I/\sigma(I) \rangle$      | 23.7 (1.7)                    | 13.2 (1.9)                    | 19.8 (2.8)                            | 16.5 (2.3)                           | 7.0 (1.5)                             | 17.4 (2.3)                            | 18.0 (1.2)                    | 22.6 (4.0)                    |
| CC <sub>1/2</sub>                  | 1.000 (0.821)                 | 0.999 (0.807)                 | 0.999 (0.822)                         | 0.999 (0.858)                        | 0.999 (0.894)                         | 1.000 (0.865)                         | 0.999 (0.745)                 | 1.000 (0.950)                 |
| <b>Refinement</b>                  |                               |                               |                                       |                                      |                                       |                                       |                               |                               |
| Resolution (Å)                     | 38.33 - 1.99                  | 45.08 - 1.75                  | 48.40 - 1.75                          | 48.88 - 1.75                         | 48.30 - 1.90                          | 45.27 - 1.91                          | 48.03 - 1.81                  | 38.63 - 1.90                  |
| Number of reflections used         | 22171                         | 32329                         | 65454                                 | 65967                                | 51057                                 | 25138                                 | 29200                         | 25, 657                       |
| R <sub>work</sub> (%)              | 22.63                         | 17.89                         | 18.77                                 | 18.71                                | 22.25                                 | 19.57                                 | 19.42                         | 18.86                         |
| R <sub>free</sub> (%)              | 25.95                         | 20.94                         | 21.36                                 | 22.26                                | 26.63                                 | 22.89                                 | 23.28                         | 22.49                         |
| Final model                        |                               |                               |                                       |                                      |                                       |                                       |                               |                               |
| Number of protein residues         | 229                           | 229                           | 456                                   | 456                                  | 452                                   | 229                                   | 229                           | 228                           |
| Number of water molecules          | 71                            | 189                           | 315                                   | 353                                  | 115                                   | 94                                    | 136                           | 89                            |
| Number of ligand atoms             | 3                             | 27                            | 62                                    | 62                                   | 68                                    | 30                                    | 20                            | 20                            |
| Average B-factor (Å <sup>2</sup> ) |                               |                               |                                       |                                      |                                       |                                       |                               |                               |
| Protein                            | 51                            | 27                            | 27                                    | 27                                   | 40                                    | 33                                    | 36                            | 38                            |
| Solvent                            | 46                            | 37                            | 36                                    | 37                                   | 42                                    | 38                                    | 43                            | 43                            |
| Ligands                            | FMT: 52                       | SAM: 19                       | Compound 1: 39<br>FMT: 40<br>DMSO: 40 | Compound 1: 40<br>FMT: 41<br>DMSO:47 | Compound 1a: 44<br>FMT: 51<br>DMSO:38 | Compound 2: 45<br>FMT: 41<br>DMSO: 32 | Compound 2: 47<br>FMT: 47     | Compound 2a: 38<br>FMT: 50    |
| R.m.s. deviations                  |                               |                               |                                       |                                      |                                       |                                       |                               |                               |
| Bond lengths (Å)                   | 0.013                         | 0.010                         | 0.009                                 | 0.010                                | 0.012                                 | 0.011                                 | 0.011                         | 0.011                         |
| Bond angles (°)                    | 1.141                         | 1.047                         | 1.049                                 | 1.074                                | 1.131                                 | 1.076                                 | 1.091                         | 1.105                         |
| Ramachandran plot (%)              |                               |                               |                                       |                                      |                                       |                                       |                               |                               |
| Favoured                           | 96.44                         | 97.78                         | 97.77                                 | 97.32                                | 97.52                                 | 97.33                                 | 97.33                         | 98.65                         |
| Allowed                            | 3.56                          | 2.22                          | 2.23                                  | 2.68                                 | 2.48                                  | 2.67                                  | 2.67                          | 1.35                          |
| Outliers                           | 0                             | 0                             | 0                                     | 0                                    | 0                                     | 0                                     | 0                             | 0                             |

|        |      |      |      |      |      |      |      |      |
|--------|------|------|------|------|------|------|------|------|
| PDB ID | 7SE6 | 7SE7 | 7SE8 | 7SE9 | 7SEC | 7SEA | 7SEB | 7SED |
|--------|------|------|------|------|------|------|------|------|

The statistics were calculated using AIMLESS [1] and MolProbity [2].

Statistics for the highest-resolution shell are shown in parentheses.

$$R_{\text{merge}} = \sum_{hkl} \sum_j |I_{hkl,j} - \langle I_{hkl} \rangle| / (\sum_{hkl} \sum_j I_{hkl,j})$$

$$R_{\text{work}} / R_{\text{free}} = \sum_{hkl} |F_{hkl}^{\text{obs}} - F_{hkl}^{\text{calc}}| / (\sum_{hkl} F_{hkl}^{\text{obs}}); R_{\text{free}} \text{ was calculated using randomly chosen}$$

5-10 % fraction of data that was excluded from refinement.

**Table S2.** Structural comparison of hFBL with Archaeal and fungal Fibrillarin homologs.

| <b>Organism</b>                   | <b>PDB ID</b> | <b>RMSD</b>                        |
|-----------------------------------|---------------|------------------------------------|
| <i>Methanococcus jannaschii</i>   | 1G8S          | 1.3 (231 aligned C $\alpha$ atoms) |
| <i>Saccharolobus solfataricus</i> | 3PLA          | 1.0 (228 aligned C $\alpha$ atoms) |
| <i>Pyrococcus furiosus</i>        | 3NMU          | 1.2 (228 aligned C $\alpha$ atoms) |
| <i>Aeropyrum pernix</i>           | 4DF3          | 1.5 (231 aligned C $\alpha$ atoms) |
| <i>Saccharomyces cerevisiae</i>   | 6ND4          | 1.3 (228 aligned C $\alpha$ atoms) |
| <i>Chaetomium thermophilum</i>    | 5JPQ          | 1.0 (227 aligned C $\alpha$ atoms) |

**Table S3.** Binding affinities of compounds with hFBL derived from SPR assays and corresponding docking scores from molecular docking.

| <b>Compound</b> | <b><math>K_D</math> (<math>\mu</math>M)</b> | <b>Docking score (kJ mol<sup>-1</sup>)</b> |
|-----------------|---------------------------------------------|--------------------------------------------|
| SAM             | 33.7 $\pm$ 7.7                              |                                            |
| <b>1</b>        | 520 $\pm$ 40                                | -7.74                                      |
| <b>1a</b>       | 510 $\pm$ 50                                | -8.00                                      |
| <b>1b</b>       | 6490 $\pm$ 720                              | -7.73                                      |
| <b>1c</b>       | 2660 $\pm$ 40                               | -7.42                                      |
| <b>1d</b>       | 3350 $\pm$ 480                              | -7.49                                      |
| <b>2</b>        | 2700 $\pm$ 780                              | -7.33                                      |
| <b>2a</b>       | 43.8 $\pm$ 2.2                              | -7.83                                      |
| <b>2b</b>       | 250 $\pm$ 20                                | -7.59                                      |

### Supplementary References

1. Evans, P. Scaling and Assessment of Data Quality. *Acta Crystallogr. D Biol. Crystallogr.* **2006**, *62*, 72–82, doi:10.1107/S0907444905036693.
2. Chen, V.B.; Arendall, W.B.; Headd, J.J.; Keedy, D.A.; Immormino, R.M.; Kapral, G.J.; Murray, L.W.; Richardson, J.S.; Richardson, D.C. MolProbity: All-Atom Structure Validation for Macromolecular Crystallography. *Acta Crystallogr. D Biol. Crystallogr.* **2010**, *66*, 12–21, doi:10.1107/S0907444909042073.
